# Supplementary material for: Identification of Residues Important for the Activity ofHaloferax volcaniiAglD, a Component of the Archaeal N-Glycosylation Pathway
Source: Hindawi journal article supplement (doi:10.1155/2010/315108), 2010-01-01
Supplement: f1 [file 315108.f1.pdf]

**Supplementary Table 1 – Primers used for site-directed mutagenesis of *aglD***

| <b>Mutant</b> | <b>Primers</b>                                                                                                                               |
|---------------|----------------------------------------------------------------------------------------------------------------------------------------------|
| D110A         | CGACACGCTCGTCTACTTC <b>GCC</b> ACGGACCTCGCCACGGAC (Fwd)<br>GTCCGTGGCGAGGTCCGT <b>GGC</b> GAAGTAGACGAGCGTGTCG (Rev)                           |
| D110E         | GACACGCTCGTCTACTTC <b>GAG</b> ACGGACCTCGCCACGGACATG (Fwd)<br>CATGTCCGTGGCGAGGTCCGT <b>CTC</b> GGAAGTAGACGAGCGTGTC (Rev)                      |
| D110K         | GACACGCTCGTCTACTTC <b>AA</b> GACGGACCTCGCCACGGACATG (Fwd)<br>CATGTCCGTGGCGAGGTCCGT <b>CTT</b> GGAAGTAGACGAGCGTGTC (Rev)                      |
| D110N         | GACACGCTCGTCTACTTC <b>AA</b> CACGGACCTCGCCACGGACATG (Fwd)<br>CATGTCCGTGGCGAGGTCCGT <b>GTT</b> GGAAGTAGACGAGCGTGTC (Rev)                      |
| D112A         | CACGCTCGTCTACTTCGACACG <b>GCC</b> TCGCCACGGACATGCGACACC (Fwd)<br>GGTGTGCGATGTCCGTGGCGAG <b>GGC</b> CGTGTCTGAAGTAGACGAGCGTG (Rev)             |
| D112E         | CACGCTCGTCTACTTCGACACG <b>GAG</b> CTCGCCACGGACATGCGACACC (Fwd)<br>GGTGTGCGATGTCCGTGGCGAG <b>CTC</b> CGTGTCTGAAGTAGACGAGCGTG (Rev)            |
| D112K         | CACGCTCGTCTACTTCGACACG <b>AA</b> GCTCGCCACGGACATGCGACACC (Fwd)<br>GGTGTGCGATGTCCGTGGCGAG <b>CTT</b> CGTGTCTGAAGTAGACGAGCGTG (Rev)            |
| D112N         | CACGCTCGTCTACTTCGACACG <b>AA</b> CTCGCCACGGACATGCGACACC (Fwd)<br>GGTGTGCGATGTCCGTGGCGAG <b>GTT</b> CGTGTCTGAAGTAGACGAGCGTG (Rev)             |
| D133A         | GCGTCCGCTCCGGCGAGTAC <b>GCC</b> GCCGCGACCGGGTTCGCGCTG (Fwd)<br>CAGCGGACCCGGTTCGCGGC <b>GGC</b> GTAAGTAGACGAGCGGACGC (Rev)                    |
| G137A         | GCGAGTACGACGCCGCGAC <b>GCC</b> TCGCGCTGGATGCCCGACCGC (Fwd)<br>GCGGTCCGGCATCCAGCGGAG <b>GGC</b> GGTTCGCGGCGTCTACTCGC (Rev)                    |
| S138A         | GAGTACGACGCCGCGACCGGG <b>GCC</b> CGTGGATGCCCGACCGCGTC (Fwd)<br>GACCGGTTCGGGCATCCAGCG <b>GGC</b> CCCCGGTTCGCGGCGTCTACTC (Rev)                 |
| R139A         | GAGTACGACGCCGCGACCGGGTTC <b>GCC</b> TGGATGCCCGACCGCGTCGCCGAC (Fwd)<br>GTCGGGACGCGGTTCGGGCATCC <b>AGC</b> CGACCCGGTTCGCGGCGTCTACTC (Rev)      |
| R139D         | GAGTACGACGCCGCGACCGGGTTC <b>GACT</b> TGGATGCCCGACCGCGTCGCCGACC (Fwd)<br>GGTCCGGGACGCGGTTCGGGCATCC <b>AGTCC</b> GACCCGGTTCGCGGCGTCTACTC (Rev) |
| R139E         | GAGTACGACGCCGCGACCGGGTTC <b>GAGT</b> TGGATGCCCGACCGCGTCGCCGACC (Fwd)<br>GGTCCGGGACGCGGTTCGGGCATCC <b>ACTCC</b> GACCCGGTTCGCGGCGTCTACTC (Rev) |
| R139K         | GAGTACGACGCCGCGACCGGGTTC <b>AA</b> GTGGATGCCCGACCGCGTCGCCGACC (Fwd)<br>GGTCCGGGACGCGGTTCGGGCATCC <b>CTT</b> CGACCCGGTTCGCGGCGTCTACTC (Rev)   |
| R139M         | GAGTACGACGCCGCGACCGGGTTC <b>AT</b> GTGGATGCCCGACCGCGTCGCCGACC (Fwd)<br>GGTCCGGGACGCGGTTCGGGCATCC <b>CAT</b> CGACCCGGTTCGCGGCGTCTACTC (Rev)   |
| R152A         | GTCGCCGACCGTCCGCGGAAA <b>GCC</b> GGCGTGCCGAGTCGCGCATA (Fwd)<br>GTATGCGGACTCGGCACGCC <b>GCC</b> TTTCCGCGGACGGTTCGGCGAC (Rev)                  |
| R152D         | GTCGCCGACCGTCCGCGGAAA <b>GAC</b> GGCGTGCCGAGTCGCGCATA (Fwd)<br>GTATGCGGACTCGGCACGCC <b>GTC</b> TTTCCGCGGACGGTTCGGCGAC (Rev)                  |
| R152K         | GTCGCCGACCGTCCGCGGAAA <b>AA</b> GGCGTGCCGAGTCGCGCATA (Fwd)<br>GTATGCGGACTCGGCACGCC <b>CTT</b> TTTCCGCGGACGGTTCGGCGAC (Rev)                   |

D173A CTCCGCTCGGACCTCCGC**GCC**CACCAGTGCGGCTTCAAG (Fwd)  
 CTTGAAGCCGCACTGGT**GGC**GCGGAGGTCCGAGCGGAG (Rev)

D173E CTCCGCTCGGACCTCCGC**GAG**CACCAGTGCGGCTTCAAGG (Fwd)  
 CCTGAAGCCGCACTGGT**GCT**GCGGAGGTCCGAGCGGAG (Rev)

D173K CTCCGCTCGGACCTCCGC**AAG**CACCAGTGCGGCTTCAAGG (Fwd)  
 CCTGAAGCCGCACTGGT**GCTT**GCGGAGGTCCGAGCGGAG (Rev)

D173N CTCCGCTCGGACCTCCGC**AAC**CACCAGTGCGGCTTCAAGG (Fwd)  
 CCTGAAGCCGCACTGGT**GTT**GCGGAGGTCCGAGCGGAG (Rev)

Q175A GCTCGGACCTCCGCGACCAC**GCGT**GCGGCTTCAAGGCGTTCAG (Fwd)  
 CTGAACGCCTTGAAGCCGC**ACGCT**GGTGCGGAGGTCCGAGC (Rev)

C176A CGGACCTCCGCGACCACCAG**GCC**GGCTTCAAGGCGTTCAGCCGCG (Fwd)  
 CGCGGCTGAACGCCTTGAAGCC**GGC**CTGGTGGTTCGCGGAGGTCCG (Rev)

G177A GACCTCCGCGACCACCAGTGC**GCC**TTCAGGCGTTCAGCCGCGAG (Fwd)  
 CTCGCGGCTGAACGCCTTGA**AGC**GCACTGGTGGTTCGCGGAGGTC (Rev)

F178A GACCTCCGCGACCACCAGTGC**GCC**AAGGCGTTCAGCCGCGAGGCG (Fwd)  
 CGCCTCGCGGCTGAACGCCTT**GGC**GCCGCACTGGTGGTTCGCGGAGGTC (Rev)

K179A GCGACCACCAGTGC**GCG**GCGTTCAGCCGCGAGGCGTTC (Fwd)  
 GAACGCCTCGCGGCTGAACGC**CGC**GAAGCCGCACTGGTGGTTCGC (Rev)

D195A GCTCCGCGACGACGTAGAG**GAG**AACCACTGGTTTTGGGACAC (Fwd)  
 GTGTCCAAAACCACTGGTT**CTC**CTCTACGTCGTCGCGGAGC (Rev)

D195E GCTCCGCGACGACGTAGAG**GAG**AACCACTGGTTTTGGGACAC (Fwd)  
 GTGTCCAAAACCACTGGTT**CTC**CTCTACGTCGTCGCGGAGC (Rev)

D201A GAGGACAACCACTGGTTTTGG**GCC**ACGGAGATGCTCGTCCGCGCCC (Fwd)  
 GGGCGCGGACGAGCATCTCCGT**GGC**CCAAAACCACTGGTTGTCTC (Rev)

D201E GAGGACAACCACTGGTTTTGG**GAG**ACGGAGATGCTCGTCCGCGCCC (Fwd)  
 GGGCGCGGACGAGCATCTCCGT**CTC**CCAAAACCACTGGTTGTCTC (Rev)

D201K GAGGACAACCACTGGTTTTGG**AAG**ACGGAGATGCTCGTCCGCGCCC (Fwd)  
 GGGCGCGGACGAGCATCTCCGT**CTT**CCAAAACCACTGGTTGTCTC (Rev)

D201N GAGGACAACCACTGGTTTTGG**AAC**ACGGAGATGCTCGTCCGCGCCC (Fwd)  
 GGGCGCGGACGAGCATCTCCGT**GTT**CCAAAACCACTGGTTGTCTC (Rev)

---

Fwd – forward primer; Rev – reverse primer. The codon containing the introduced mutation is shown in bold.
